# Supplementary material
Source: MDPI journal article supplement (https://www.mdpi.com/2221-3759/9/2/19)

**Table S1. Embryonic lethality caused by the RNAi**

| Genotype          | # Trials | Alive | Dead | Total | % Dead |
|-------------------|----------|-------|------|-------|--------|
| <i>hmr-1 RNAi</i> | 3        | 338   | 305  | 643   | 47     |
| <i>gex-3 RNAi</i> | 5        | 65    | 1296 | 1361  | 95     |
| <i>hmp-2 RNAi</i> | 3        | 430   | 278  | 708   | 39     |
| <i>hmp-1 RNAi</i> | 1        | 361   | 27   | 388   | 7      |
| <i>dlg-1 RNAi</i> | 1        | 211   | 119  | 360   | 36     |
| <i>gex-2 RNAi</i> | 1        | 182   | 283  | 465   | 61     |

**Table S2. GFP knockdown by the RNAi**

| Genotype                                    | N  | Mean | % Decrease | Max  | % Decrease |
|---------------------------------------------|----|------|------------|------|------------|
| <i>hmr-1::gfp</i>                           | 6  | 546  |            | 1925 |            |
| <i>hmr-1::gfp; hmr-1 RNAi</i>               | 6  | 107  | 80         | 291  | 85         |
| <i>unc-40 gex-3; gex-3::gfp</i>             | 9  | 218  |            | 449  |            |
| <i>unc-40 gex-3; gex-3::gfp; gex-3 RNAi</i> | 7  | 55   | 75         | 127  | 72         |
| <i>hmp-1::gfp</i>                           | 6  | 420  |            | 911  |            |
| <i>hmp-1::gfp; hmp-1 RNAi</i>               | 6  | 367  | 13         | 864  | 5          |
| <i>hmp-2::gfp</i>                           | 10 | 391  |            | 972  |            |
| <i>hmp-2::gfp; hmp-2</i>                    | 13 | 380  | 3          | 742  | 24         |

**Figure S1. GFP Knockdown with RNAi**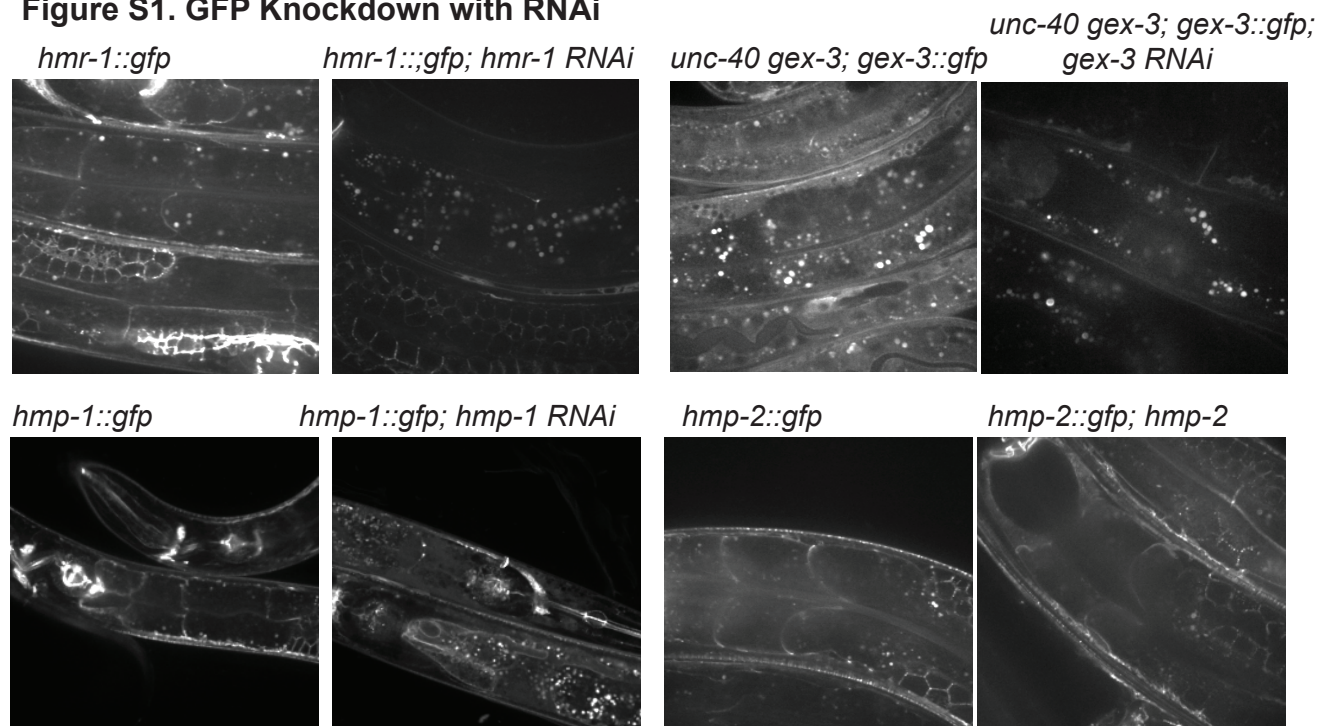

Supplement: s1 [file s1]
